# Supplementary material
Source: PubMed Central journal article supplement (PMC5452818)
Supplement: AEM.00538-17_zam999117881s1.pdf [file AEM.00538-17_zam999117881s1.pdf]

## Supplementary material.

Supplementary Table S1. Number of pigs that have received additional treatments before T<sub>1</sub> or after T<sub>2</sub>.

| Treatment      | Before T <sub>1</sub> <sup>a</sup> | After T <sub>2</sub> |
|----------------|------------------------------------|----------------------|
| Colistin       | 641                                | 0                    |
| Lincomycin     | 19                                 | 0                    |
| Oxytetracyclin | 10                                 | 73                   |
| Tiamulin       | 4                                  | 37                   |
| Doxycyclin     | 57                                 | 293                  |
| Amoxicilin     | 185                                | 16                   |
| Other          | 27                                 | 2                    |

a. Note that the same pig may have received more than one treatment before T<sub>1</sub> and may have received more than one treatment after T<sub>2</sub>.



Supplementary Figure S1. Difference in Log<sub>10</sub> CFU of coliforms plated on McConkey agar without tetracycline and with 16 ug/ml tetracycline according to classification as sensitive or resistant to tetracycline.



**Supplementary Figure S2.** Box plot illustrating  $\log_{10}$  CFU/g total coliforms in fecal samples from pigs at different time points relative to treatment with different doses of OTC or given OTC by different modes of treatment. Normal, Low and High refer to groups of pigs subjected to five days of oral OTC batch treatment using 10 mg/kg (ND), 5 mg/kg (LD), and 20 mg/kg (HD) dosages, respectively. Injection (IM) and Pen (PW) refer to groups treated with 10 mg/kg OTC for five days individually by injection and pen-wise. T1-T4 refers to the time points where fecal samples were obtained: T1: immediately before treatment, T2: two days after end of treatment, T3: when pigs left the nursery unit, T4: 1-7 days before slaughter. The boxes indicate the interquartile range. The open circles indicate data points more than 1.5 times the interquartile range from the median.



**Supplementary Figure S3.** Box plot illustrating  $\text{Log}_{10}$  CFU/g tetracycline resistant coliforms (top) and square root of fraction of tetracycline resistant coliforms (bottom) in fecal samples from treated and untreated pigs in the penwise and injection treated groups at different time points relative to treatment with OTC. Injection (IM) and Pen (PW) refer to groups treated with 10 mg/kg OTC for five days individually by injection and pen-wise. T1-T4 refers to the time points where fecal samples were obtained: T1: immediately before treatment, T2: two days after end of treatment, T3: when pigs left the nursery unit, T4: 1-7 days before slaughter. The boxes indicate the interquartile range. The open circles indicate data points more than 1.5 times the interquartile range from the median.
